# Supplementary material
Source: publisher figshare collection journal article supplement (https://tandf.figshare.com/ndownloader/files/18735662)
Supplement: Supplementary file 1 [file 18735662]

Platelet-endothelial associations promote cytomegalovirus production in the salivary gland in mice

Supplemental Figures

Supplemental Table 1. Group sizes for each time point, organ of interest and condition as analyzed by qPCR (1A), plaque assays (1B), flow cytometry (1C), and immunohistochemistry (1D). Sample sizes differed based on sample availability for each organ.

| **qPCR Sample Size** | | | |
| --- | --- | --- | --- |
| **Timepoint** | **Spleen** | **Salivary Gland** | **Lung** |
|  |  |  |  |
| Day 0 Undepleted | 10 | 10 | 10 |
| Day 0 Depleted | 7 | 8 | 8 |
| Day 3 Undepleted | 11 | 11 | 11 |
| Day 3 Depleted | 8 | 8 | 8 |
| Day 8 Undepleted | 7 | 8 | 9 |
| Day 8 Depleted | 6 | 6 | 6 |
| Day 21 Undepleted | 12 | 12 | 12 |
| Day 21 Depleted | 8 | 8 | 8 |

(**a**)

| **Plaque Assay Sample Size** | | | |
| --- | --- | --- | --- |
| **Timepoint** | **Spleen** | **Salivary Gland** | **Lung** |
|  |  |  |  |
| Day 0 Undepleted | 5 | 10 | 10 |
| Day 0 Depleted | 7 | 8 | 8 |
| Day 3 Undepleted | 9 | 8 | 8 |
| Day 3 Depleted | 6 | 11 | 11 |
| Day 8 Undepleted | 7 | 9 | 9 |
| Day 8 Depleted | 4 | 5 | 6 |
| Day 21 Undepleted | 11 | 11 | 12 |
| Day 21 Depleted | 7 | 6 | 8 |

(**b**)

| **Flow Cytometry Analysis Sample Size** | |
| --- | --- |
| **Timepoint** | **Spleen** |
|  |  |
| Day 0 | 10 |
| Day 3 | 11 |
| Day 8 | 9 |
| Day 21 | 12 |

| **Immunohistochemistry Sample Size** | |
| --- | --- |
| **Timepoint** | **Spleen** |
|  |  |
| Day 0 | 10 |
| Day 3 | 9 |
| Day 8 | 9 |
| Day 21 | 11 |

(**c**) (**d**)
